1 Effectiveness of surface-based North Atlantic  
2 right whale detection methods for vessel strike  
3 mitigation

4 Loïcka M.R. Baille <sup>\*1</sup> and Daniel P. Zitterbart<sup>1</sup>

5 <sup>1</sup>Applied Ocean Physics and Engineering Department, Woods  
6 Hole Oceanographic Institution, Woods Hole, MA, USA

7 August 2021

8 **Abstract**

9 Increasing commercial and recreational use of the world's ocean  
10 leads to growing concerns on vessel and marine mammal encounters.  
11 For endangered species, like the North Atlantic right whale (NARW),  
12 vessel strikes can be responsible for the majority of the recorded  
13 deaths. Reducing the number of vessel strikes is key to improve North  
14 Atlantic right whale protection and a number of mitigation methods  
15 have been proposed and implemented. In this manuscript, we devel-  
16 oped an agent-based model to assess the effectiveness of surface-based  
17 whale detection methods for vessel strike mitigation. We find that the  
18 effectiveness of such systems varies highly depending on the vessel's

---

\*lbaille@whoi.edu

## NARW surface-based detection methods effectiveness

---

1 speed and maneuverability. We also find that if vessel-based whale  
2 detection systems are used in conjunction with other mitigation mea-  
3 sures such as general speed restrictions, they can be very effective and  
4 could lead to a significant decrease in vessel strikes when deployed at  
5 a large-scale.

6 **Keywords**— conservation, marine mammals, ship-strike, collision, marine  
7 spatial planning, endangered species

# 8 1 INTRODUCTION

## 9 1.1 Vessel strikes worldwide

10 Cetaceans face a multitude of anthropogenic threats, such as vessel strikes, ocean  
11 pollution, ocean noise, climate change, fishing gear entanglement, and even whaling  
12 in some parts of the world (Sèbe et al. 2019). A vessel or ship strike is defined as any  
13 physical impact, fatal or not, between any part of a watercraft and a live marine  
14 animal (Peel et al. 2018). Vessel strikes and entanglement have become main  
15 concerns as the world’s oceans have been experiencing an increasing level of use  
16 due to growing commercial and recreational activities (Sèbe et al. 2019). In 1890,  
17 the total recorded world fleet amounted to 11,108 commercial vessels (>100 gross  
18 tons), while in 2020, over 98,000 were accounted for, which is equivalent to a 783%  
19 growth (Laist et al. 2001, NATIONS n.d.). This surge in maritime traffic led to  
20 growing concerns as vessel strikes do impact marine life welfare, crew’s safety, and  
21 lead to negative economic consequences (Schoeman et al. 2020). With the growing  
22 interest in autonomous vessels, even greater numbers of vessels are expected to

## NARW surface-based detection methods effectiveness

---

1 travel the oceans, hence increasing the risk of vessel strikes. Since 2005 vessel  
2 strikes have been identified as a priority by the International Whaling Commission  
3 Conservation Committee (IWC-CC). IWC-CC aims to identify at-risk populations  
4 and high-risk areas to develop and implement solutions to achieve a permanent  
5 reduction in vessel strikes (International Whaling Commission). Schoeman et al.  
6 (2020) established that at least 75 marine species are being affected by vessel  
7 strikes, from North Atlantic Right Whales (NARWs), dolphins, to penguins, and  
8 fish.

### 9 **1.2 Vessel strikes NARW**

10 The North Atlantic right whale (NARW, *Eubalaena glacialis*) is one of the world's  
11 most endangered large whale species, with approximately 360 individuals remain-  
12 ing in 2019 (Moore et al. 2021). Fishing gear entanglement and vessel strikes are  
13 responsible for at least 86 mortalities and serious injuries in the US and Canada be-  
14 tween 2000 and 2017 (NOAA Fisheries, Office of Protected Resources 2020). Due  
15 to low numbers, high mortality rates and low calving rates the species has been  
16 classified as “Endangered” under the Endangered Species Act since 1970. While  
17 most large whale species are vulnerable to vessel traffic (Laist et al. 2001), NARWs  
18 are two orders of magnitude more prone to vessel strikes (Vanderlaan & Taggart  
19 2007). This is due to their surface-skimming feeding behavior, and their habitats  
20 and migration routes often overlapping with ports and/or shipping lanes (Parks  
21 et al. 2012, Fisheries Thu, 06/03/2021 - 11:54). Vessel strikes account for 52.5%  
22 of all deaths among necropsied right whales between 1970 and 2006 (Campbell-  
23 Malone et al. 2008). Assessing the true number of NARW vessel strikes is still

## NARW surface-based detection methods effectiveness

---

1 a difficult task, as struck animals might not be stranded or found. Pace et al.  
2 (2021) estimated that only 36% of all estimated NARW deaths were accounted  
3 for via observed carcasses between 1990 and 2017 (Pace et al. 2021). Estimates of  
4 annually struck animals vary from 0.81 (Hayes et al. 2018) to tens or hundreds  
5 (Conn & Silber 2013) whales per year.

### 6 **1.3 Large Scale vessel strikes mitigation strategies**

7 During the last decades a variety of mitigation measures have been developed to  
8 reduce the probability of vessel strikes. Vessel strike mitigation approaches can be  
9 classified into either large-scale approaches, where high-risks areas are established  
10 and a set of navigation rules are implemented, and small-scale approaches, that  
11 rely on vessels to detect at-risk animals and subsequently alter their course and  
12 speed to avoid collision. It is to be noted that marine mammal observations from  
13 vessel-based methods can always be used to inform large-scale mitigation efforts  
14 about the presence of an animal at a given location and time. In the following, we  
15 will provide a brief overview of the existing mitigation efforts for North Atlantic  
16 right whales.

#### 17 **1.3.1 Re-routing**

18 Rerouting aims to separate vessels from areas that are highly used by NARWs.  
19 Once high-risk regions are established, alternative vessel routes may be created  
20 to avoid such areas. Routing measures may be permanent, seasonal, mandatory  
21 or recommended, and may apply to all vessels or only a subset (Schoeman et al.  
22 2020). Currently the following implementations of re-routing are used:

## NARW surface-based detection methods effectiveness

---

1 **Area To Be Avoided (ATBA)** ATBAs discourage vessels from transiting  
2 through certain areas of the ocean. Specifically, the International Maritime Or-  
3 ganization (IMO) defines an ATBA as "a routeing measure comprising an area  
4 within defined limits in which either navigation is particularly hazardous or it is  
5 exceptionally important to avoid casualties and which should be avoided by all  
6 vessels, or certain classes of vessels" (*Ships' Routeing* n.d.). Seasonal ATBAs in  
7 the Great South Channel, Cape Cod Bay, MA and Roseway Basin, Canada were  
8 established to protect North Atlantic Right Whales (Vanderlaan & Taggart 2009).

9 **Dynamic Management Areas (DMAs)** In the US, voluntary DMAs, also  
10 called Slow Zones, are discrete areas established by NOAA Fisheries, where visual  
11 sightings of three or more North Atlantic right whales have been recorded within  
12 15 days (Fisheries Thu, 06/03/2021 - 12:38). Mariners are encouraged to avoid  
13 these temporary areas or reduce their speed to 10 knots or less when transiting  
14 through them to avoid vessel strike (Fisheries Thu, 06/03/2021 - 12:38). NOAA  
15 created the Right Whale Sightings Advisory System to collect, validate, and com-  
16 municate visual sightings reported by individuals. Those reports may also be used  
17 to establish new DMAs (Johnson et al. 2020).

18 **Seasonal Management Areas (SMAs)** When passing through SMAs, all  
19 vessels 65 feet (19.8 meters) or longer must travel at 10 knots or less, along the U.S.  
20 east coast (Cape Cod Bay, off Race Point, Great South Channel), at certain times  
21 of the year to reduce the threat of vessel collisions with endangered North Atlantic  
22 right whales (Services n.d.). Van der Hoop et al. (2015) observed that large whale  
23 mortalities due to vessel strikes decreased when SMAs are active compared to

## NARW surface-based detection methods effectiveness

---

1 when SMAs are not active (van der Hoop et al. 2015).

2 **Traffic Separation Schemes (TSSs)** TSSs are routing measures that sep-  
3 arate opposing streams of traffic through the establishment of traffic lanes. Cer-  
4 tain of these permanent mandatory routes have been amended to reduce the co-  
5 occurrence of vessels and whales (Santa Barbara Channel, San Francisco Bay, Bay  
6 of Fundy (Canada), Boston) (Fisheries Thu, 06/03/2021 - 12:38, Schoeman et al.  
7 2020).

### 8 **1.3.2 Speed restrictions**

9 It has been shown that reducing vessels' speed decreases vessel strikes' rate and  
10 the injuries' severity (Vanderlaan & Taggart 2007, Gende et al. 2011, Conn &  
11 Silber 2013). Laist et al. (2001), and later Conn and Silber (2013), showed that  
12 the probability of lethal injury decreased to lower than 50% when traveling at  
13 speeds  $\leq 10$  knots. In both studies, the vessel strike rate also decreased for lower  
14 vessel speeds. Proposals for speed restrictions can be submitted to the Interna-  
15 tional Maritime Organization to implement, voluntary or mandatory, permanent  
16 or seasonal, vessel speed restriction zones outside of territorial waters (Silber, Van-  
17 derlaan, Tejedor Arceredillo, Johnson, Taggart, Brown, Bettridge & Sagarminaga  
18 2012). A reduction in vessel speed is the preferred measure to implement when  
19 vessels cannot be re-routed (Schoeman et al. 2020).

## NARW surface-based detection methods effectiveness

---

### 1 **1.4 Small Scale vessel strike mitigation strategies**

2 The desired vessel strike mitigation measure would be applied on an individual  
3 vessel basis, where each transiting vessel would be in charge of detecting at-risk  
4 animals and react accordingly, by slowing down and changing its course to mini-  
5 mize the risk of vessel strike (Weinrich et al. 2010, Flynn & Calambokidis 2019).  
6 Such mitigation measures can be implemented on-top of large-scale mitigation  
7 strategies or independently (Wiley et al. 2016).

### 8 **1.5 Detection Methods**

9 In order to establish high-risk areas and/or to implement small-scale mitigation  
10 measures, a multitude of methods have been developed to detect large marine  
11 mammals.

#### 12 **1.5.1 Passive Acoustic Mitigation (PAM)**

13 PAM capabilities have massively improved over the last two decades as acous-  
14 tic monitoring overcomes some of the limitations visual monitoring faces, such  
15 as bad weather (Verfuss et al. 2018). PAM relies on underwater microphones, hy-  
16 drophones, to detect, classify and/or localise marine mammals' vocalizations, from  
17 a few hundred meters away to several kilometers depending on the environmental  
18 condition and species' vocalization frequencies (Verfuss et al. 2018). Hydrophones  
19 can either be permanently moored down or towed by a vessel, more commonly  
20 on seismic surveys (Verfuss et al. 2018). Moored PAM systems, in the form of  
21 auto-detection buoys with hydrophones located 60-120ft below the surface, have  
22 been implemented in the Port of Boston, Cape Cod Bay, the coasts of Georgia

## NARW surface-based detection methods effectiveness

---

1 and Florida (Baumgartner et al. 2019). These PAM systems constantly listen  
2 for NARW calls and send potential detections to a command-and-control center  
3 where trained analysts validate the sound. If the call is within 5-nautical miles of  
4 the buoy, alerts are sent out via radio, email, online (Right Whale Listening Net-  
5 work) to LNG tankers with re-routing or speed reduction instructions (Knowlton  
6 2020). However, PAM relies on animals to vocalise frequently and on background  
7 noise to be low enough to not interfere with vocalizations (Zitterbart et al. 2020).  
8 Hence, this method can lead to varying results due to environmental conditions,  
9 equipment, deployment types and target species (Verfuss et al. 2018). Very few of  
10 those systems are suitable for small-scale vessel strike mitigation approaches due  
11 to the logistical effort of towing hydrophone systems capable of detecting animals  
12 vocalizing in front of the vessel.

### 13 **1.5.2 Marine Mammal Observers (MMOs)**

14 Manual detection of marine mammals via dedicated observers is still the most  
15 prevalent method used for any mitigation purposes (Weinrich et al. 2010, Zitterbart  
16 et al. 2020). Trained marine mammal observers scan the ocean surface surrounding  
17 the vessel, up to 5000 m, for potential sightings (Pyc et al. 2015). Weinrich  
18 et al. (2010) showed that MMOs are more likely to detect animals than other  
19 crew members thanks to their experience and their lack of distractions from other  
20 factors. However, marine mammal observers are impacted by weather conditions  
21 and can only work at night in conjunction with night vision goggles, which greatly  
22 reduces the effectiveness (Schoeman et al. 2020). Weinrich et al. (2010) found that  
23 trained marine observers significantly increased the number of sightings on high-



## NARW surface-based detection methods effectiveness

---

1 speed vessels and effectively prevented vessel strikes. During their study's time  
2 frame, the ferry using a dedicated MMO did not experience any strikes, while a  
3 similar boat without MMOs, transiting through the same route, collided with a  
4 fin whale (Weinrich et al. 2010).

### 5 **1.5.3 Active Acoustic Monitoring (AAM)**

6 Active acoustics has successfully been implemented to detect marine mammals up  
7 to 2000 m in front of a vessel via active sonars (Pyc et al. 2015). This technique  
8 emits pulses of sounds and records returning echoes to localize objects. Active  
9 acoustic methods inadvertently increase noise levels in the water, which can be  
10 detrimental to marine species (André et al. 2011) and performance highly varies  
11 with the prevalent sound propagation conditions.

### 12 **1.5.4 Radio Detection and Ranging (RADAR)**

13 RADAR systems emit electromagnetic waves, and record for returning echoes to  
14 determine size, shape, distance, and speed of a target. RADAR technology aims  
15 to detect surface targets such as an animal body part, exhalations or sea surface  
16 disturbances (Verfuss et al. 2018). It operates best at detection ranges under a  
17 kilometer and at low sea state conditions as the shorter wavelength of electromag-  
18 netic waves are rapidly absorbed by water molecules (Verfuss et al. 2018).

### 19 **1.5.5 Thermal Infrared Imaging (Thermal IR)**

20 Thermal IR scanners are passive imaging systems that can be used day and night,  
21 on land (Zitterbart et al. 2020) and vessels (Zitterbart et al. 2013). They rely on

## NARW surface-based detection methods effectiveness

---

1 an apparent temperature difference between the above-surface body parts of the  
2 animal or its exhalation and the ocean. Thermal IR systems have been shown to  
3 detect large whales reliably up to several kilometers away (Zitterbart et al. 2020).

4 The aim of this study is to assess the effectiveness of surface detection methods  
5 (i.e. detecting the animal when it is at the surface), such as thermal imaging,  
6 radar or marine mammal observers for vessel strike mitigation of NARWs. This  
7 was achieved by creating an agent-based model, where vessel strike risk can be  
8 assessed for different vessels and animal characteristics. The agents' behavior was  
9 derived from experimentally collected NARW dive profiles (Baumgartner & Mate  
10 2003, Baumgartner et al. 2017). We find that the detection performance and  
11 the vessel characteristics (speed, and capacity to change vessel's course and speed)  
12 have the highest impact on the ability to detect a NARW early enough to still take  
13 evasive action. Furthermore, we find that when vessel-based mitigation strategies  
14 are paired with large-scale mitigation approaches, such as speed restriction (10kn),  
15 significant levels of protection can be achieved.

## 16 **2 MATERIALS AND METHODS**

### 17 **2.1 WHorld (the grid)**

18 A 3-dimensional grid was generated and virtual vessels and whales (animats) were  
19 distributed randomly on that grid and instructed to move for 60min (in model  
20 time). Each vessel was placed on the grid with a fixed speed and trajectory. Simi-  
21 larly, each animat was placed on the grid and instructed to move in the horizontal  
22 plane according to a correlated random walk with a random  $\pm 5^\circ$  change in head-

## NARW surface-based detection methods effectiveness

---

1 ing between steps, a fixed speed, and a uniquely generated dive profile. The online  
2 supplementary material provided along this manuscript summarizes the sets of  
3 parameters used for each of the simulated cases.

## 4 **2.2 Whales**

### 5 **2.2.1 Dive profiles**

6 Each animat followed an artificially generated dive profile. To mimic true NARW  
7 dive behavior, we extracted the diving characteristics from biologging data col-  
8 lected in the summers of 2000 and 2001 via suction-cup mounted time-depth  
9 recorders (TDR) (Baumgartner & Mate 2003, Baumgartner et al. 2017). Using  
10 those characteristics, a unique dive profile was generated for each animat. Ar-  
11 tificial dive profiles were generated as follows: time-depth data from TDR were  
12 manually selected and trimmed for quality control, e.g. remove time sections when  
13 the tag fell off the animal. Dive profiles were classified by a human analyst as ei-  
14 ther shallow or deep dives, depending on the whales feeding behavior inferred from  
15 the dive profile. Subsequently, time-depth data were segmented into three depth  
16 layers: surface [0 - 5m], subsurface [5 - 10m], and deep 10+m, as those sections de-  
17 termine the whale's availability bias as well as their vulnerability to vessel strikes.  
18 We used the distributions of duration, occurrences, and number of transitions be-  
19 tween depth sections to generate artificial dive profiles. For simulation purposes,  
20 four behavioral states were established. State 0 corresponds to the whale blowing  
21 at the water surface, making the animat available for detection. State 1 and state  
22 2 correspond to a whale located 0-5m and 5-10m deep, respectively. In both states  
23 1 and 2, the whale is considered vulnerable to vessel strikes as the hull of many

## NARW surface-based detection methods effectiveness

---

1 vessels can reach such depths, making vessel strikes with the diving animal possible.  
2 Finally, when a whale dives deeper than 10m, it is considered to be out of reach  
3 of most non-container vessels' hulls and therefore not susceptible to vessel strikes.  
4 Larger container vessels that can have drafts up to 15.3m (Ultra Large Container  
5 Vessel) are not considered in this study because we assume their maneuverability  
6 is so limited that effective mitigation measures through evasive maneuvers could  
7 not be implemented (Wikipedia 2021).

8       During the simulation, we studied three different animat behaviors for shallow,  
9 deep and mixed diving behavior. Shallow and deep artificial dive profiles were  
10 exclusively generated from dive profiles classified as shallow and deep respectively,  
11 while in mixed behavior, all dive profiles were considered.

### 12 **2.2.2 Inter-blow Interval (IBI)**

13 We define an animal as available for detection when it is exhaling at the surface,  
14 because that is the main cue used by thermal imaging detection systems and marine  
15 mammal observers when the animal is far enough away for evasive actions to still  
16 be feasible (Zitterbart et al. 2013). Times of exhalation cannot be extracted from  
17 dive profiles. We therefore incorporated exhalations (state 0, 3 seconds long) into  
18 the artificial dive profiles while the animat is at the surface (state 1) at certain  
19 intervals, defined as the inter-blow interval (IBI). In this simulation, 30, 60, 120, and  
20 300sec IBIs were tested.

## NARW surface-based detection methods effectiveness

---

### 1 **2.3 Vessels**

2 Our aim for this simulation was to provide an assessment for a broad range of  
3 vessels. Maritime vessels that are susceptible to vessel strikes come in a large  
4 variety of vessel configurations, many more than we could consider within the scope  
5 of this study. The same is true for the variety of detection systems. Therefore, we  
6 chose the vessels and detection systems parameters to be broad enough so that they  
7 apply to a wide range of vessel categories. A summary of the vessel's parameters  
8 used is provided in Table 1. We modeled vessel speeds from 1-15m/s to account for  
9 a wide range of vessels, from fishing vessels to high-speed ferries. The field of view  
10 of the detection system was chosen to be 20°, which is a reasonable assumption  
11 because the vessels' speed is usually several times higher than a whale's swimming  
12 speed, therefore it is highly unlikely for a whale to enter a vessel's path from beyond  
13 that area. Each vessel was modeled with a specific and constant reliable detection  
14 range. The reliable detection range (RDR) is defined as the maximum distance  
15 at which a whale blow would be detected with certainty (probability of detection  
16 (PD) = 1). To account for a wide variety of vessel types, we define a ship's Reaction  
17 Time (RT) as the time a vessel requires to make an effective mitigation maneuver.  
18 This variable integrates covariates such as a vessel's maneuverability, its ability to  
19 slow down, and the time needed between detection and alert.

## 1 **2.4 Detection**

### 2 **2.4.1 Detection Function**

3 We used a detection function, defined as the probability to detect a whale's blow  
4 at a given distance, obtained during a previous experiment (Zitterbart et al. 2020).  
5 Humpback whale blow detection data was collected using a thermal IR imaging  
6 camera off Poipu Shores, Hawaii in 2016, comparable to a point-transect distance  
7 sampling detection scheme. We derived the detection function by fitting a log-  
8 normal distribution to the detection data. The range at which the fitted detection  
9 function peaks (1600m) was used as the furthest distance a whale blow would be  
10 detected with certainty (e.g. probability of detection (PD) = 1), previously defined  
11 as Reliable Detection Range (RDR).

12 To assess the impact of the shape of the detection function, i.e. detections  
13 beyond RDR (PD<sub>1</sub>), we tested two different scenarios. In the RDR scenario,  
14 the detection probability is binary, set to 1 for ranges below or equal to RDR,  
15 and 0 for ranges beyond RDR. In the Data- driven Detection Function (DDF)  
16 scenario, the detection probability is set to 1 for ranges below or equal to RDR,  
17 and logarithmically decreases according to the detection function (Figure 3 A).

18 To test different reliable detection ranges, either in the RDR or DDF scenarios,  
19 the detection function was simply moved along the x-axis, while the shape of the  
20 detection function was kept similar (Appendix ??).

### 21 **2.4.2 Detection performance metric**

22 For successful mitigation, a whale has to be detected early enough (in-time) so  
23 the vessel can still take evasive actions (Zitterbart et al. 2013). This can be pa-

## NARW surface-based detection methods effectiveness

---

1 parameterized with the definition of a safe zone and a danger zone (Figure 1). We  
2 define the danger zone as the area where if a whale was detected there, the vessels  
3 would be too close to safely maneuver to avoid a strike. The danger zone range  
4 (DZR) is derived from the vessel's speed and the reaction time ( $DZR=RT*\text{vessel}$   
5  $\text{speed}$ ). On the other hand, the safe zone represents the area from the DZR to the  
6 far end of the detection range. When a whale is detected in this zone, vessels have  
7 enough time to implement the necessary measures to safely alter their trajectories  
8 and avoid a strike. In our study, a whale is detected in-time when it was spotted in  
9 the safe zone, before it entered the danger zone. We define the In-Time Detection  
10 Probability (ITDP) as our metric to evaluate the impact of the different vessel and  
11 whale parameters. Only whales that would enter the danger zone are considered.  
12 The ITDP is defined as the proportion of whales that were detected in the safe  
13 zone from all whales that entered the danger zone.

14 The simulation code and supporting data can be found in this repository:  
15 [https://github.com/whoi-mars/WHorld\\_public.git](https://github.com/whoi-mars/WHorld_public.git)

## 16 **3 RESULTS**

### 17 **3.1 Detection Function Shape**

18 We find that the shape of the detection function (Figure 3B; Appendix ??) has a  
19 significant impact on the ITDP. When we do not consider whales that are detected  
20 at distances where the probability of detection is less than 1 (RDR scenario, 1000m,  
21 Figure 4A), the ITDP drops to values below 90% for vessel-reaction time (RTs)  
22 above 1.5min, and to zero for RTs above 3min (Figure 4A). This can be explained

## NARW surface-based detection methods effectiveness

---

1 by the linear increase of the danger zone with reaction time, for a given speed (5m/s  
2 in this example). Due to a fixed detection range, a larger danger zone reduces the  
3 safe zone and vice versa. Beyond a certain RT, the danger zone range will be  
4 larger than the reliable detection range, thus the ITDP will be zero. In contrast, if  
5 detections beyond RDR are considered (DDF case), the ITDP does not drop below  
6 90% even when RT=10min, which we consider to be a very long reaction time.  
7 This is explained by the fact that animals can be detected further out, hence are  
8 available for detection in the safe zone more frequently. For the remainder of this  
9 article we will only consider the DDF case, because of its superior ITDP. In every  
10 operational setting, DDF is the realistic detection case, and the RDR scenario is  
11 only relevant for academic purposes.

### 12 **3.2 Whale Speed**

13 We find that in our model, the swimming speed of the animal has no effect on  
14 the ITDP (Figure 4B). This can be explained by the speed difference between the  
15 animal and the vessel. At slow vessel speeds, the safe zone is much larger than the  
16 danger zone, thus the animal is often available for detection regardless of its speed,  
17 hence we obtain high ITDP values. At higher vessel speeds, the ITDP drops. The  
18 decrease of the ITDP is independent from the whales' speed and is only caused by  
19 increasing vessel speeds which drive up the danger zone range ( $DZR=RT*vessel$   
20  $speed$ ). The only case where the whale's speed could have an impact on ITDP  
21 is when an animal would be swimming (in a diving state) from outside the safe  
22 zone's swath directly into the danger zone. The combinations of whale and vessel  
23 speed we chose apparently make this case impossible. Whales would need to be



## NARW surface-based detection methods effectiveness

---

1 swimming at equal or higher speeds than the vessel, which is unrealistic for a  
2 prolonged duration. A comprehensive plot summarizing the ITDP results as a  
3 function of ship speeds for different whale speeds can be found in Appendix B.

### 4 **3.3 Inter-Blow Interval (IBI)**

5 Since inter-blow-interval data was not readily available, we simulated a range of  
6 possible IBIs (30, 60, 120, and 300sec) where each blow is detectable for 3 sec-  
7 onds. We find that the IBI does not reduce the ITPD by more than 16% (vessel  
8 speed=10m/s, RDR=1000m). In this case, we chose a rather high vessel speed  
9 of 10m/s compared to the other results presented, which were evaluated at 5m/s  
10 vessel speed, because at 5m/s the impact of the IBI is negligible. Furthermore,  
11 IBI only has an impact for RT larger than 300 sec. Overall, the impact of the IBI  
12 can be considered rather small.

### 13 **3.4 Diving Behavior**

14 Diving behavior of NARWs changes significantly throughout the year, depending  
15 on either the food availability at different depths of the ocean or the behavioral  
16 state of the animal (breeding vs foraging) (Murison & Gaskin 1989). We find that  
17 at low vessel speeds ( $\leq 5$ m/s), the behavior of the whale has negligible impact on  
18 the ITDP (98-100%). The diving behavior of the whale starts to have an impact for  
19 higher vessel speeds. At 10m/s, there is a 25% decrease of ITDP between shallow  
20 and deep dives. This observation can be explained by the fact that if the whale is  
21 on a deep dive, it is less often available for detection, i.e. fewer surfacings reduce  
22 the chances of detection in the safe zone, making the animal more vulnerable to

## NARW surface-based detection methods effectiveness

---

1 strikes. The ITDP for mixed diving behavior lies as expected between deep and  
2 shallow diving behaviors which were used to compose it. To best generalize, we  
3 chose mixed diving behavior for the other presented results.

### 4 **3.5 Reliable Detection Range (RDR)**

5 The reliable detection range (RDR) is one of the main factors that determines  
6 the size of the safe zone. At a given vessel speed and reaction time (RT), the  
7 danger zone is constant in size, hence with increasing RDR, only the safe zone  
8 increases. As expected, with increasing RDR (i.e increasing safe zone), ITDP  
9 values increase as well. Because the size of the danger zone is determined by  
10 the vessel's speed and RT, both parameters have to be considered jointly. For  
11 shorter RTs (RT=1min,5min), the ITDP [99-100%] is independent of both the  
12 vessel speeds (5 m/s vs. 10m/s) and the RDR [500-3000m] (Figure 4E). However,  
13 for longer RTs (RT=10min), higher vessel speeds negatively impact the ITDP.  
14 Specifically, we observe that the ITDP decreases by up to 81% [47-81%] when  
15 comparing results obtained at vessel speeds of 5m/s vs. 10m/s for RT=10min.

### 16 **3.6 Vessel Reaction Time (RT)**

17 We find that the impact of RT on the ITDP is highly dependent on the vessel's  
18 speed. For short RTs, the ITDP is not significantly impacted by increasing vessel  
19 speeds (at most a 2% decrease across vessel speeds [1-15m/s] when RT=1min).  
20 On the other hand, longer RTs are very sensitive to higher vessel speeds with a  
21 decrease of up to 90% when comparing the ITDP of RT=10min at vessel speeds  
22 of 5m/s vs. 15m/s. At low vessel speeds ( $\leq 5\text{m/s}$ ), the impact of RT is at most a

## NARW surface-based detection methods effectiveness

---

1 10% decrease (RT=1 min vs RT=10 min), compared to 90% for high vessel speeds  
2 (10m/s) (Figure 4F). This can be explained by higher RTs leading to larger danger  
3 zones, which increase the probability of a detectable whale surfacing in that zone  
4 rather than in the safe zone. A comprehensive plot summarizing the ITDP results  
5 as a function of ship speeds for all parameter modelled combinations can be found  
6 in Appendix C.

## 7 4 DISCUSSION

### 8 4.1 Lack of effective measures

9 Most of the current mitigation measures have significant limitations that impact  
10 their ability to properly and consistently protect NARWs and other marine mam-  
11 mals from vessel strike. Re-routing measures are not always feasible or when in  
12 place, rely on the cooperation of mariners. Vanderlaan & Taggart (2009) found  
13 that 71% of boats complied with the voluntary Roseway Basin ATBA in Canada,  
14 which led to a 82% decrease in lethal strikes to right whales in that region (Vander-  
15 laan & Taggart 2009). To improve compliance, increased enforcement might ben-  
16 efit certain areas, but cannot always be achieved due to limited resources and/or  
17 large areas (Schoeman et al. 2020). Additionally, re-routing measures might help  
18 protect one species, but put at higher risk another one (Redfern et al. 2013).  
19 Similarly, when vessel speed restrictions are complied with, they are effective in  
20 decreasing the rate of strikes as well as the severity of injury (Vanderlaan & Tag-  
21 gart 2009). Edbon et al. (2020) observed that lethal vessel strikes to Bryde's  
22 whales (*Balaenoptera edeni brydei*) in the Hauraki Gulf, New Zealand have halved

## NARW surface-based detection methods effectiveness

---

1 since the implementation of speed reduction from 13.2 kt to 10 kt (Ebdon et al.  
2 2020). However, the effectiveness of this measure entirely depends on compliance  
3 from mariners, which studies have shown to be low (Silber, Adams & Bettridge  
4 2012, McKenna et al. 2012). For instance, along the coast of California, a volun-  
5 tary conservation program was implemented asking vessels to reduce their speed  
6 to 10kt or less when transiting through a 75 nm stretch of shipping lanes in the  
7 region. McKenna et al. (2012) observed that speeds were not at or below the rec-  
8 ommended 10 knots, nor were daily average speeds reduced during the requested  
9 periods. Hence, similarly as re-routing measures, increased enforcement should  
10 improve effectiveness of speed reduction programs when resources and geography  
11 allow. More recent statistics show increasing cooperation from the mariners to  
12 follow the 10kn speed rule. In 2018-2019, the highest level (81%) of mariner com-  
13 pliance with the speed rule was observed (NOAA Fisheries, Office of Protected  
14 Resources 2020). In most Seasonal Management Areas, 25% to 83% of the vessels  
15 maintained a speed under 10 kn (NOAA Fisheries, Office of Protected Resources  
16 2020). Low numbers can be explained by the economic impact resulting from  
17 longer transits. NOAA Fisheries estimates it to be around \$28.3 to \$38.4 mil-  
18 lion annually, with the majority of the cost (50-70%) falling on the container ship  
19 sector (NOAA Fisheries, Office of Protected Resources 2020). The addition of  
20 vessel-based mitigation measures might be beneficial to improve effectiveness and  
21 compliance of current mitigation strategies. The purpose of our model is to assess  
22 in which scenarios, vessel-based whale strike mitigation would be useful to enhance  
23 protection of large whales. To this end, we have to consider the impact it would  
24 have (e.g. the ITDP) in different real-world scenarios.

## 1 **4.2 Vessel Parameters Dependency**

### 2 **4.2.1 Low vessel speed scenario**

3 The most important finding is that in slow-speed environments, such as speed  
4 restricted zones, vessel-based whale detection systems for strike mitigation would  
5 provide a high protection for the animals. Specifically, if a vessel travels slowly  
6 (5m/s), any form of detection system with at least 1000m of reliable detection  
7 range will lead to high in-time detection probabilities (>90%). Detection ranges  
8 of 1000m can be achieved on the majority of vessels that provide  $\geq 5$ m elevation  
9 (Zitterbart et al. 2020). Due to the slow vessel-speed, parameters such as the  
10 reaction time of the vessel become less relevant. The reaction time as we use it  
11 is mainly determined by the vessel's maneuverability (which cannot be changed)  
12 and the time between detection and alert. The fact that the reaction time is of  
13 less relevance during slower travel is a key finding as it opens up the possibility  
14 for remote validation of vessel-based detections. One could imagine a system  
15 where automatic detections are transmitted to a data-center in near-real time and  
16 validated immediately. Turn-around times would likely be on the order of minutes,  
17 short enough to alert the vessel about the whale's presence without any false alerts.  
18 We consider false alerts to be a major reason why automatic vessel-based whale  
19 detection systems could not be directly used by the vessel's crew. We speculate  
20 that even at relatively low false alert rates (6 per hour, (Zitterbart et al. 2013)), a  
21 vessel's crew is likely to soon ignore warnings.

## NARW surface-based detection methods effectiveness

---

### 1 **4.2.2 High vessel speed scenario**

2 In areas where vessel speed is not regulated and vessels travel at higher speeds  
3 (5-15m/s), we can group vessels into three classes. When vessels have a high  
4 maneuverability and have the capability to change velocity quickly, vessel-based  
5 whale detection systems can be very effective (ITDP > 98%), under the conditions  
6 that the reliable detection range is at least 1km and that the time from detection  
7 to alert is minimal (on the order of seconds). Currently, such conditions could  
8 only be met with dedicated observers on-board, who could either be scanning the  
9 ocean surface, or validate automatic detections provided by a whale detection sys-  
10 tem. Obtaining such a quick response comes with great efforts and costs, and  
11 hence is unlikely to be implemented on a large scale. For vessels with longer reac-  
12 tion times (lower maneuverability and/or longer detection-to-alert time), a whale  
13 detection system can still be effective if the reliable detection range is increased  
14 to several kilometers (+58% RDR=3000m vs. RDR=1000m when RT=5min and  
15 vessel speed=15m/s). This is valid for a large group of vessels (e.g. cruise vessels)  
16 that have high enough elevations to provide large detection ranges for the whale  
17 detection system (Zitterbart et al. 2020). Thus, longer reaction times can be off-  
18 setted by more advanced detection systems with larger reliable detection ranges or  
19 by slowing down the vessel's speed. However, for vessels that travel at very high  
20 speeds, have very poor maneuverability, and might travel in shipping lanes, where  
21 quick maneuvers are not feasible (e.g. supertankers, large container vessels), no  
22 currently available vessel-based detection methods would provide enough detection  
23 range for effective protection.

### 1 **4.3 Whale parameters dependency**

2 Another finding of this simulation study is that animal behavioral factors such as  
3 swimming speeds, diving profiles and the inter-blow interval are not as impactful  
4 on the detection as the vessels' parameters. Our simulation showed that varying  
5 whale speeds does not have any impact on the ITDP. This can be explained by the  
6 fact that NARWs are slow swimmers ( $\sim 0.36\text{m/s}$  on average) (Hain et al. 2013).  
7 Hence, at such low swimming speeds, their movement becomes negligible compared  
8 to the faster vessel speeds. Thus, we learn that in the case of NARWs, the animals'  
9 horizontal movements do not need to be considered for the design of vessel-based  
10 detection systems (e.g. field of view), which can have a significant impact on  
11 the system costs, and potentially negatively impact their wide-spread use. Our  
12 study confirmed that NARW going on deep dives are more prone to collisions as  
13 they have fewer surfacings, compared to surface feeding NARWs (25% decrease at  
14  $10\text{m/s}$  vessel speed). However, our study also highlights that NARW's behavior is  
15 only impactful when vessels are traveling at high speeds ( $10+\text{m/s}$ ). Slower vessels  
16 have an equally high ITDP (98+%) regardless of the NARW's diving behavior  
17 (Figure 4D). Hence, a large-scale mitigation measure, such as a speed restriction  
18 zone, would help alleviate the impact of whales' diving behavior, and make the  
19 use of vessel-based mitigation systems most effective.

## 20 **5 CONCLUSIONS**

21 To summarize, under the right conditions (slow average vessel speed, high maneu-  
22 verability) vessel-based whale detection systems can be very effective for whale-

## NARW surface-based detection methods effectiveness

---

1 strike mitigation and a large-scale deployment of such systems in high-risk areas  
2 could effectively reduce whale-strikes. While certain vessel classes cannot directly  
3 benefit from a vessel-based whale detection system, the information obtained and  
4 shared from other vessels equipped with such a system, could help estimate a near  
5 real-time distribution of whales in critical areas and improve the large-scale dy-  
6 namic management efforts. With future technological improvements on the hard-  
7 ware (larger detection ranges) and software (fewer false positives), vessel strike  
8 mitigation systems could become a standard tool in the maritime industry.

## 9 **6 ACKNOWLEDGMENT**

10 This work was supported by the Navy's Office of Naval Research (ONR) under  
11 award number N000141912669. Additionally, we would like to thank Mark Baum-  
12 gartner for providing North Atlantic Right Whales dive profile data collected in  
13 2000 and 2001.

## 14 **LITERATURE CITED**

- 15 André, M., Houégnigan, L., van der Schaar, M., Delory, E., Zaugg, S., Sánchez,  
16 A. M. & Mas, A. (2011), *Localising Cetacean Sounds for the Real-Time Mitiga-*  
17 *tion and Long-Term Acoustic Monitoring of Noise*, IntechOpen.
- 18 Baumgartner, M. F., Bonnell, J., Parijs, S. M. V., Corkeron, P. J., Hotchkin, C.,  
19 Ball, K., Pelletier, L.-P., Partan, J., Peters, D., Kemp, J., Pietro, J., Newhall,  
20 K., Stokes, A., Cole, T. V. N., Quintana, E. & Kraus, S. D. (2019), 'Persistent



NARW surface-based detection methods effectiveness

---

- 1 near real-time passive acoustic monitoring for baleen whales from a moored  
2 buoy: System description and evaluation', *Methods in Ecology and Evolution*  
3 **10**(9), 1476–1489.
- 4 Baumgartner, M. & Mate, B. (2003), 'Summertime foraging ecology of North  
5 Atlantic right whales', *Marine Ecology Progress Series* **264**, 123–135.
- 6 Baumgartner, M., Wenzel, F., Lysiak, N. & Patrician, M. (2017), 'North Atlantic  
7 right whale foraging ecology and its role in human-caused mortality', *Marine*  
8 *Ecology Progress Series* **581**, 165–181.
- 9 Campbell-Malone, R., Barco, S. G., Daoust, P.-Y., Knowlton, A. R., McLellan,  
10 W. A., Rotstein, D. S. & Moore, M. J. (2008), 'Gross and Histologic Evidence of  
11 Sharp and Blunt Trauma in North Atlantic Right Whales (*Eubalaena glacialis*)  
12 Killed by Vessels', *Journal of Zoo and Wildlife Medicine* **39**(1), 37–55.
- 13 Conn, P. & Silber, G. (2013), 'Vessel speed restrictions reduce risk of collision-  
14 related mortality for North Atlantic right whales', *Ecosphere* **4**, art43.
- 15 Ebdon, P., Riekkola, L. & Constantine, R. (2020), 'Testing the efficacy of ship  
16 strike mitigation for whales in the Hauraki Gulf, New Zealand', *Ocean & Coastal*  
17 *Management* **184**, 105034.
- 18 Fisheries, N. (Thu, 06/03/2021 - 11:54), 'North Atlantic Right Whale — NOAA  
19 Fisheries', <https://www.fisheries.noaa.gov/species/north-atlantic-right-whale>.
- 20 Fisheries, N. (Thu, 06/03/2021 - 12:38), 'Reducing Vessel  
21 Strikes to North Atlantic Right Whales — NOAA Fish-

## NARW surface-based detection methods effectiveness

---

- 1 eries', <https://www.fisheries.noaa.gov/national/endangered-species->  
2 conservation/reducing-vessel-strikes-north-atlantic-right-whales.
- 3 Flynn, K. R. & Calambokidis, J. (2019), 'Lessons From Placing an Observer on  
4 Commercial Cargo Ships Off the U.S. West Coast: Utility as an Observation  
5 Platform and Insight Into Ship Strike Vulnerability', *Frontiers in Marine Science*  
6 **6**.
- 7 Gende, S. M., Hendrix, A. N., Harris, K. R., Eichenlaub, B., Nielsen, J. & Pyare,  
8 S. (2011), 'A Bayesian approach for understanding the role of ship speed in  
9 whale–ship encounters', *Ecological Applications* **21**(6), 2232–2240.
- 10 Hain, J. H. W., Hampp, J. D., McKenney, S. A., Albert, J. A. & Kenney, R. D.  
11 (2013), 'Swim Speed, Behavior, and Movement of North Atlantic Right Whales  
12 (*Eubalaena glacialis*) in Coastal Waters of Northeastern Florida, USA', *PLOS*  
13 *ONE* **8**(1), e54340.
- 14 Hayes, S. A., Josephson, E., Cole, T. V., Engleby, L., Garrison, L. P., Hatch,  
15 J., Henry, A., Horstman, S. C., Litz, J., Lyssikatos, M. C., Mullin, K. D., Or-  
16 phanides, C., Pace, R. M., Palka, D. L., Soldevilla, M. & Wenzel, F. W. (2018),  
17 US Atlantic and Gulf of Mexico Marine Mammal Stock Assessments - 2017: (sec-  
18 ond edition), Technical report, US DEPARTMENT OF COMMERCE, National  
19 Oceanic and Atmospheric Administration, National Marine Fisheries Service.
- 20 Johnson, H. D., Baumgartner, M. F. & Taggart, C. T. (2020), 'Estimating North  
21 Atlantic right whale (*Eubalaena glacialis*) location uncertainty following visual  
22 or acoustic detection to inform dynamic management', *Conservation Science*  
23 *and Practice* **2**(10), e267.

## NARW surface-based detection methods effectiveness

---

- 1 Knowlton, C. (2020), ‘Real-time Passive Acoustic Sensors’,  
2 [https://dosits.org/galleries/technology-gallery/observing-and-monitoring-](https://dosits.org/galleries/technology-gallery/observing-and-monitoring-marine-animals/real-time-passive-acoustic-sensors/)  
3 [marine-animals/real-time-passive-acoustic-sensors/](https://dosits.org/galleries/technology-gallery/observing-and-monitoring-marine-animals/real-time-passive-acoustic-sensors/).
- 4 Laist, D. W., Knowlton, A. R., Mead, J. G., Collet, A. S. & Podesta, M. (2001),  
5 ‘Collisions Between Ships and Whales’, *Marine Mammal Science* **17**(1), 35–75.
- 6 McKenna, M. F., Katz, S. L., Condit, C. & Walbridge, S. (2012), ‘Response of  
7 Commercial Ships to a Voluntary Speed Reduction Measure: Are Voluntary  
8 Strategies Adequate for Mitigating Ship-Strike Risk?’, *Coastal Management*  
9 **40**(6), 634–650.
- 10 Moore, M., Rowles, T., Fauquier, D., Baker, J., Biedron, I., Durban, J., Hamilton,  
11 P., Henry, A., Knowlton, A., McLellan, W., Miller, C., Pace, R., Pettis, H.,  
12 Raverty, S., Rolland, R., Schick, R., Sharp, S., Smith, C., Thomas, L., van  
13 der Hoop, J. & Ziccardi, M. (2021), ‘REVIEW Assessing North Atlantic right  
14 whale health: Threats, and development of tools critical for conservation of the  
15 species’, *Diseases of Aquatic Organisms* **143**, 205–226.
- 16 Murison, L. D. & Gaskin, D. E. (1989), ‘The distribution of right whales and  
17 Zooplankton in the Bay of Fundy, Canada’, *Canadian Journal of Zoology*  
18 **67**(6), 1411–1420.
- 19 NATIONS, U. (n.d.), Review of Maritime Transport 2020, Technical report,  
20 UNITED NATIONS CONFERENCE ON TRADE AND DEVELOPEMENT.
- 21 NOAA Fisheries, Office of Protected Resources (2020), North Atlantic Right  
22 Whale (*Eubalaena glacialis*) Vessel Speed Rule Assessment, Technical report.

## NARW surface-based detection methods effectiveness

---

- 1 Pace, R. M., Williams, R., Kraus, S. D., Knowlton, A. R. & Pettis, H. M. (2021),  
2 ‘Cryptic mortality of North Atlantic right whales’, *Conservation Science and*  
3 *Practice* **3**(2).
- 4 Parks, S. E., Warren, J. D., Stamieszkin, K., Mayo, C. A. & Wiley, D. (2012),  
5 ‘Dangerous dining: Surface foraging of North Atlantic right whales increases  
6 risk of vessel collisions’, *Biology Letters* **8**(1), 57–60.
- 7 Peel, D., Smith, J. N. & Childerhouse, S. (2018), ‘Vessel Strike of Whales in  
8 Australia: The Challenges of Analysis of Historical Incident Data’, *Frontiers in*  
9 *Marine Science* **5**.
- 10 Pyc, C., Geoffroy, M. & Knudsen, F. (2015), ‘An evaluation of active acoustic  
11 methods for detection of marine mammals in the Canadian Beaufort Sea’, *Ma-*  
12 *rine Mammal Science* **32**.
- 13 Redfern, J. V., McKenna, M. F., Moore, T. J., Calambokidis, J., Deangelis, M. L.,  
14 Becker, E. A., Barlow, J., Forney, K. A., Fiedler, P. C. & Chivers, S. J. (2013),  
15 ‘Assessing the risk of ships striking large whales in marine spatial planning’,  
16 *Conservation Biology: The Journal of the Society for Conservation Biology*  
17 **27**(2), 292–302.
- 18 Schoeman, R. P., Patterson-Abrolat, C. & Plön, S. (2020), ‘A Global Review of  
19 Vessel Collisions With Marine Animals’, *Frontiers in Marine Science* **7**.
- 20 Sèbe, M., Kontovas, C. A. & Pendleton, L. (2019), ‘A decision-making frame-  
21 work to reduce the risk of collisions between ships and whales’, *Marine Policy*  
22 **109**, 103697.

## NARW surface-based detection methods effectiveness

---

- 1 Services, N. F. (n.d.), ‘Compliance Guide for Right Whale Ship Strike Reduction  
2 Rule’, p. 2.
- 3 *Ships’ Routeing* (n.d.), <https://www.imo.org/en/OurWork/Safety/Pages/ShipsRouteing.aspx>.
- 4 Silber, G., Adams, J. & Bettridge, S. (2012), ‘Vessel operator response to a volun-  
5 tary measure for reducing collisions with whales’, *Endangered Species Research*  
6 **17**, 245–254.
- 7 Silber, G. K., Vanderlaan, A. S., Tejedor Arceredillo, A., Johnson, L., Taggart,  
8 C. T., Brown, M. W., Bettridge, S. & Sagarminaga, R. (2012), ‘The role of  
9 the International Maritime Organization in reducing vessel threat to whales:  
10 Process, options, action and effectiveness’, *Marine Policy* **36**(6), 1221–1233.
- 11 van der Hoop, J. M., Vanderlaan, A. S. M., Cole, T. V. N., Henry, A. G., Hall,  
12 L., Mase-Guthrie, B., Wimmer, T. & Moore, M. J. (2015), ‘Vessel Strikes to  
13 Large Whales Before and After the 2008 Ship Strike Rule’, *Conservation Letters*  
14 **8**(1), 24–32.
- 15 Vanderlaan, A. S. M. & Taggart, C. T. (2007), ‘Vessel Collisions with Whales: The  
16 Probability of Lethal Injury Based on Vessel Speed’, *Marine Mammal Science*  
17 **23**(1), 144–156.
- 18 Vanderlaan, A. S. M. & Taggart, C. T. (2009), ‘Efficacy of a Voluntary Area to  
19 Be Avoided to Reduce Risk of Lethal Vessel Strikes to Endangered Whales’,  
20 *Conservation Biology* **23**(6), 1467–1474.
- 21 Verfuss, U., Gillespie, D., Gordon, J., Marques, T., Miller, B., Plunkett, R., Theri-  
22 ault, J., Tollit, D., Zitterbart, D., Hubert, P. & Thomas, L. (2018), ‘Comparing

## NARW surface-based detection methods effectiveness

---

- 1 methods suitable for monitoring marine mammals in low visibility conditions  
2 during seismic surveys’, *Marine Pollution Bulletin* **126**, 1–18.
- 3 Weinrich, M., Pekarcik, C. & Tackaberry, J. (2010), ‘The effectiveness of dedicated  
4 observers in reducing risks of marine mammal collisions with ferries: A test of  
5 the technique’, *Marine Mammal Science* **26**(2), 460–470.
- 6 Wikipedia (2021), ‘Container ship’, *Wikipedia Foundation* .
- 7 Wiley, D. N., Mayo, C. A., Maloney, E. M. & Moore, M. J. (2016), ‘Vessel strike  
8 mitigation lessons from direct observations involving two collisions between non-  
9 commercial vessels and North Atlantic right whales ( *Eubalaena glacialis* )’,  
10 *Marine Mammal Science* **32**(4), 1501–1509.
- 11 Zitterbart, D. P., Kindermann, L., Burkhardt, E. & Boebel, O. (2013), ‘Automatic  
12 Round-the-Clock Detection of Whales for Mitigation from Underwater Noise  
13 Impacts’, *PLOS ONE* **8**(8), e71217.
- 14 Zitterbart, D. P., Smith, H. R., Flau, M., Richter, S., Burkhardt, E., Beland,  
15 J., Bennett, L., Cammareri, A., Davis, A., Holst, M., Lanfredi, C., Michel,  
16 H., Noad, M., Owen, K., Pacini, A. & Boebel, O. (2020), ‘Scaling the Laws of  
17 Thermal Imaging–Based Whale Detection’, *Journal of Atmospheric and Oceanic  
18 Technology* **37**(5), 807–824.

## NARW surface-based detection methods effectiveness

| Fixed Parameters         | Values                 | Units  |
|--------------------------|------------------------|--------|
| Vessel Speed             | 1-15                   | m/s    |
| Field of View            | 20                     | Degree |
| Reliable Detection Range | 500,100,1500,2000,3000 | Meter  |
| Reaction Time            | 60,300,600             | Second |

Table 1: Vessel parameters used for agent-based simulation

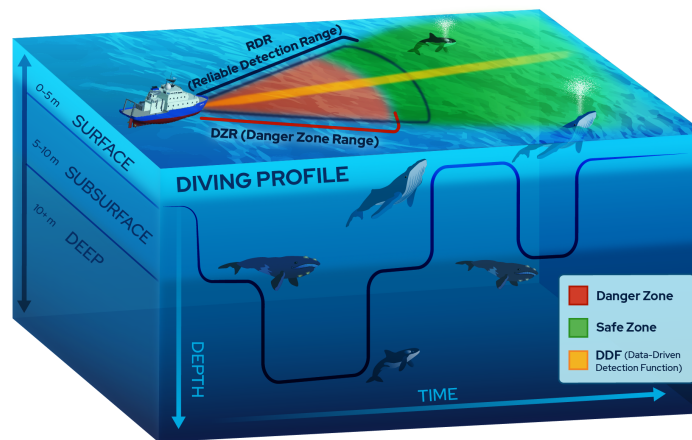

Figure 1: Definitions of relevant areas and dive states. The detection area of a surface-based detection system with a 20 degree field of view is divided into a danger zone and a safe zone, which depend on vessel speed, vessel reaction time, and the Reliable Detection Range (RDR) of the mitigation system. For the purpose of this study, the whales' possible depths were divided into three categories: surface [0-5m], subsurface [5-10m] and deep [10+m]. Only whales that are at the surface and blowing can be detected by a vessel

## NARW surface-based detection methods effectiveness

---

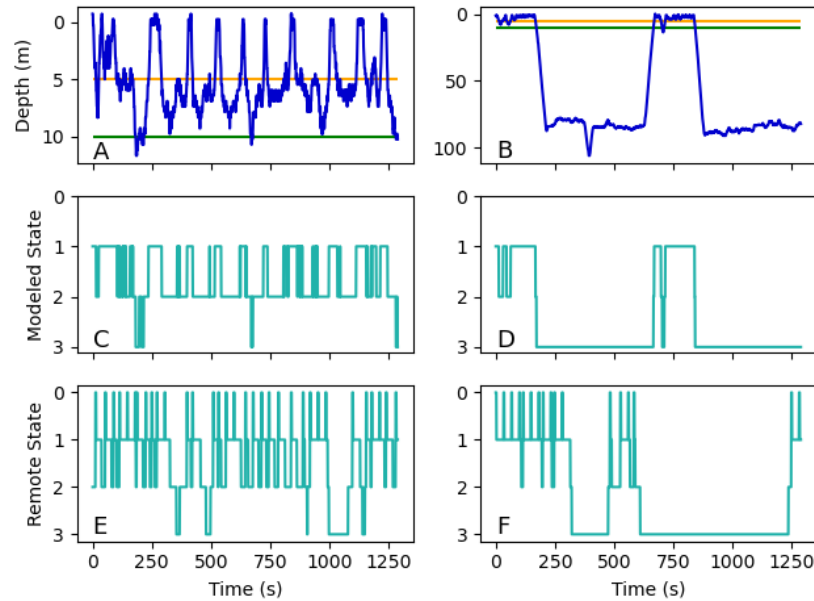

Figure 2: Artificial dive profiles are generated using a three-steps process. The left column (A,C,E) depicts the process when applied to a shallow dive behavior, while the right column (B,D,F) is applied to a deep dive behavior. The first row (A,B) illustrates true time-depth data collected via TDRs. The horizontal 5m (orange) and 10m (green) lines mark the boundaries between states 1, 2 and 3. State 1 includes depths between 0 and 5m, stage 2 encompasses depths from 5 to 10m, and stage 3 is comprised of 10m+ depths. The second row (C,D) shows the conversion from depth values to state values (0,1,2,3) based on the respective true dive profiles from the first row. Finally, the third row (E,F) shows possible examples of modeled state dive profiles derived from the respective distributions of duration, occurrences, and number of transitions between depth sections of the true time-depth data. State 0 refers to whale exhalations that were artificially added at set intervals (inter-blow intervals) since collected time-depth data did not provide such information.



## NARW surface-based detection methods effectiveness

---

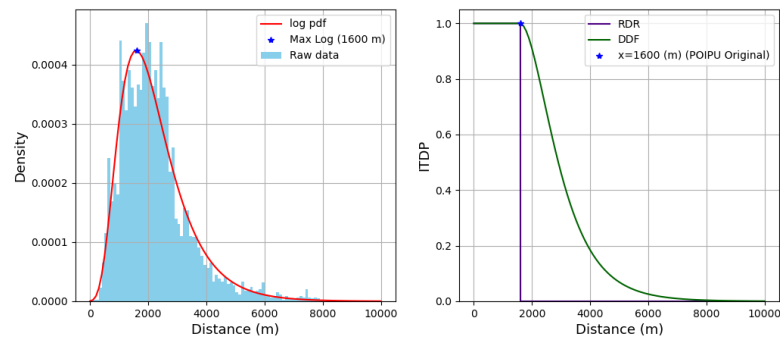

Figure 3: A) density distribution of detected blows, from humpback whales, as a function of distance. The data was collected in 2016 off the Poipu Shores, Hawaii, using a thermal IR imaging camera located 16m from the MSL. A log-normal function (log pdf, red) was fitted to the raw distribution. The maximum value reached by the log pdf is marked with a blue star (max log) at 1600m and depicts the Reliable Detection Range (RDR). B illustrates the RDR scenario (purple), where the probability of detection is equal to 1 for distances below or equal to the RDR, and the Data-driven Detection Function (DDF, green) where the function logarithmically decreases to 0 past the RDR.

NARW surface-based detection methods effectiveness

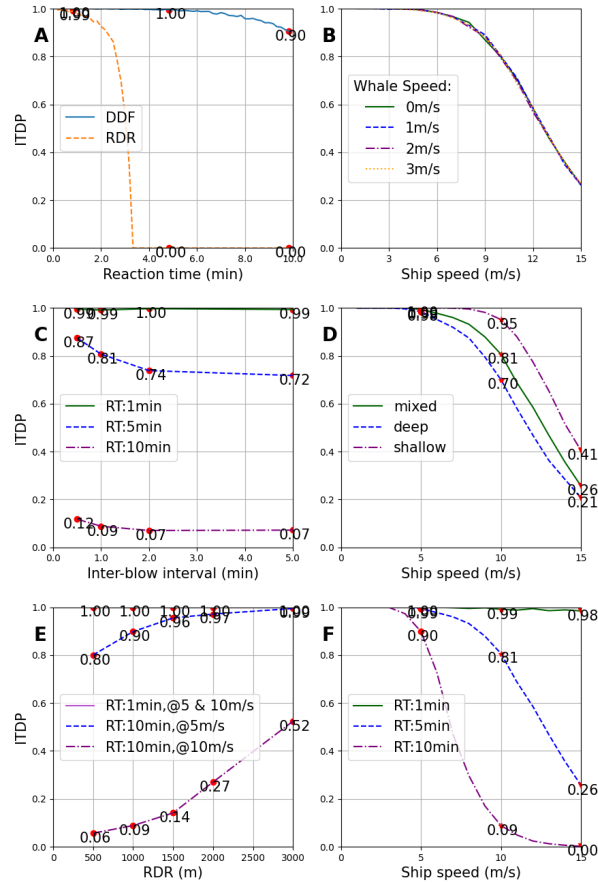

Figure 4: In-Time Detection Probability (ITDP) as a function of different parameters. A) Reaction Time (RT) for the two detection scenarios (RDR vs. DDF). B) Ship speeds for varying whale speeds (0,1,2,3m/s). C) Inter-Blow Intervals (IBI=30,60,120,300s) for different RTs (RT=1,5,10min). D) whale dive profile behavior (mixed,shallow,deep) as a function of ship speeds. E) Reliable Detection Ranges (RDRs=[500-3000m]) for varying RTs (RT=1,10min) and vessel speeds (5,10m/s). F) Reaction Times (RT=1,5,10min) as a function of ship speeds. All scenarios used DDF, RDR=1000m, DDF, IBI=60s, a mixed diving behavior, RT=300s if not otherwise mentioned.

## NARW surface-based detection methods effectiveness

### A Appendix

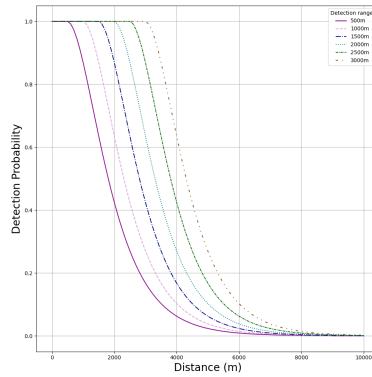

Detection Function as a function of distance (m) from the ship and detection range (m)

### B Appendix

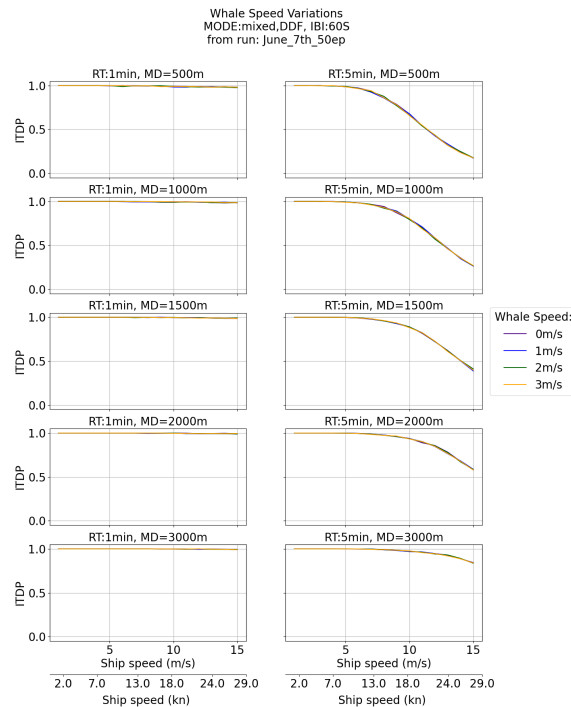

Comprehensive results of ITDP as a function of ship speeds (m/s) for varying whale speeds (m/s)

NARW surface-based detection methods effectiveness

C Appendix

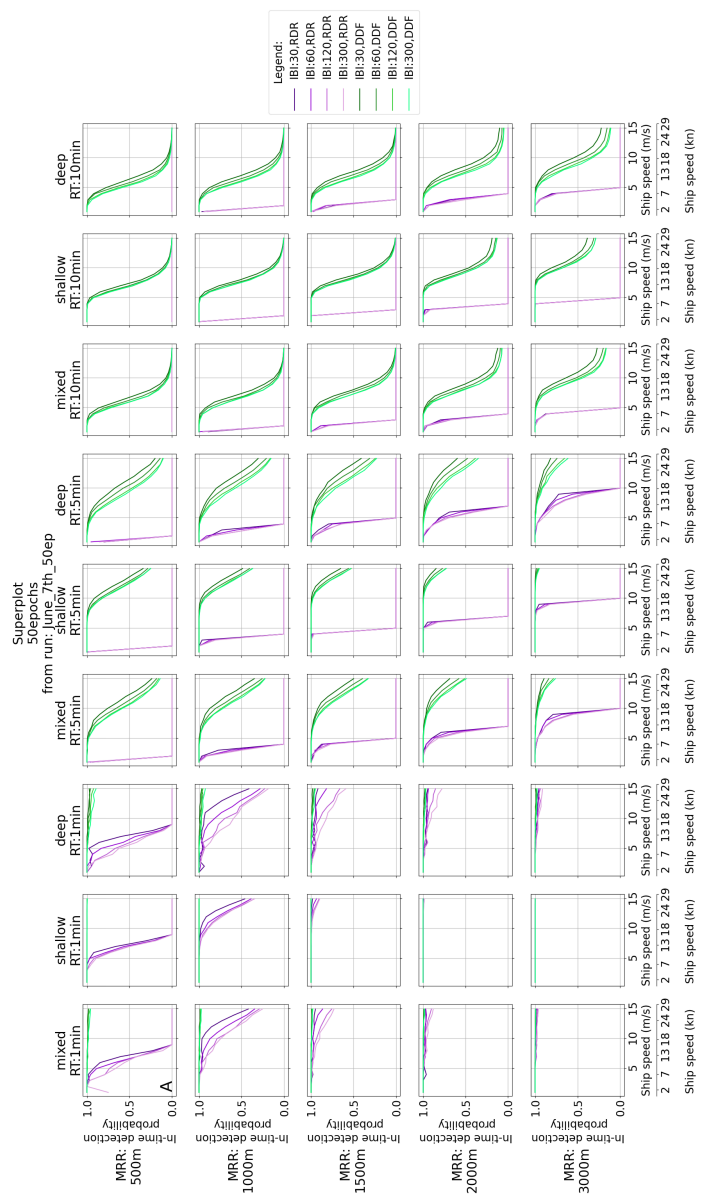

Comprehensive results of ITDP for varying ship speed (m/s) for all modelled parameters combination
